# Supplementary material for: Na+/H+ exchanger 1 participates in tobacco disease defence against Phytophthora parasitica var. nicotianae by affecting vacuolar pH and priming the antioxidative system
Source: PubMed Central journal article supplement (PMC4203143; doi:10.1093/jxb/eru351), 2014-08-28
Supplement: supp_eru351_jexbot131185_file001.pdf [file supp_eru351_jexbot131185_file001.pdf]

**Title: NHX1 participates in tobacco disease defense against *Phytophthora parasitica* var. *nicotianae* by affecting vacuolar pH and priming the anti-oxidative system**

**Xianyang Chen, Hexigeduleng Bao, Jie Guo, Weitao Jia, Fang Tai, Lingling Nie, Ping Jiang, Juanjuan Feng, Sulian Lv, Yinxin Li\***

**Supplementary Figure S1.** Screening distinctive sequence of *NbNHX1* for gene silencing. A, EST information of *NbNHX3* cloned from *N. benthamiana*. The yellow mark indicates the same sequence between unigene of SGN-U521516 and the EST of *NbNHX3*; red mark presents the same sequence between unigene of SGN-U518331 and the EST of *NbNHX3*. B-C, The sequence alignment among *NbNHX1* (Nb1), unigene *NbNHX2* (Nb2, ID: SGN-U515339), and unigene *NbNHX3* (Nb3, ID: SGN-U518331). The underline sequence indicates the distinctive 263 bp sequence from *NbNHX1* used for gene silencing.

**Supplementary Figure S2.** Virus inducing gene silencing and ectopic expression in *N. benthamiana*. A, TRV inducing gene silencing in *N. benthamiana*. Diagrams illustrate the pTRV2 derivative clone vectors used in this study. B, Phenotypes of *N. benthamiana* at 28 days post inoculation with TRV carrying a conserved fragment of a phytoene desaturase gene. C, Expression of *NbNHX1* in *NbNHX1* silenced tobaccos (N1-N30). D, Wilt spot area in *NbNHX1* silenced tobaccos (N1-N30). E, PEBV mediating ectopic gene expression in *N. benthamiana*. Diagrams illustrate the pCAPE2 derivative clone vectors used in this study. F, Phenotypes of *N. benthamiana* at 28 days post inoculation with PEBV carrying a conserved fragment of a phytoene desaturase gene. G, Expression of *NHX1* in *SeNHX1* transgenic tobaccos (S1-S30) and *AtNHX1* transgenic tobaccos (A1-A30). H, Wilt spot area in *SeNHX1* transgenic tobaccos (S1-S30) and *AtNHX1* transgenic tobaccos (A1-A30).

**Supplementary Figure S3.** *In situ* calibration curve and pH quantification test. A, The calibration curve was performed by plotting the ratio of emission fluorescence (505-550 nm) excited with 458 or 488 nm, against the pH of equilibration buffers. B,

Vacuolar pH quantification under TEST1 (pH 5.1) and TEST (pH 5.4) treatment. Data are means  $\pm$ SE ( $n = 60$  cells from 6 leaves).

**Supplementary Figure S4.** The relative expression of *NHX1* in different genotype tobacco. A, The relative expression of *NbNHX1* at 0, 24, 36 and 48 hpi. B, The relationship between relative expression of *NbNHX1* and vacuole H<sup>+</sup> net flux. C, The relative expression of *NbNHX1* in NS1-NS6. The relative expression of *NHX1* in S31-S36 (D), A31-A36 (E) and NOE1-NOE6 (F). G, The relative expression of *NbNHX1* in 6 Nb-GFP plants. The relative expression was calculated by actual expression of *NHX1* against that in untreated, or TRV plants or GFP plants.

**Supplementary Figure S5.** Vacuolar H<sup>+</sup> net fluxes in *NbNHX1* silenced *N. benthamiana* under 0 and 1.5 mM ATP or *PPi* treatment. Dynamic curves of transient H<sup>+</sup> net fluxes: normal condition plus supply of ATP (A) or *PPi* (B). C-D, Mean of vacuolar H<sup>+</sup> net fluxes corresponding to (A-B) during the measuring periods. E, The changes of vacuolar H<sup>+</sup> flux ( $\Delta$ H<sup>+</sup> flux) after ATP or *PPi* supply in TRV or TRV-Nb plants. The value obtained from NMT indicates net ion flux; the positive values of H<sup>+</sup> flux in the figures represent cation efflux or anion influx, and *vice versa*. TRV represents pTRV2 empty vector transformed tobaccos (control plants). TRV-Nb represents pTRV2-NbNHX1 vector transformed tobaccos (*NbNHX1* silenced plants). Data are means  $\pm$  SE ( $n = 6$  vacuole per *NbNHX1* silenced line, 6 independent *NbNHX1* silenced lines). The asterisks on the bars indicate significant differences from the TRV plants in the same treatment at  $P \leq 0.05$ .

**Supplementary Figure S6.** Responses of *NHX1* transgenic tobaccos to ES4326. Infection experiments were performed with 6-week-old plants of Se/At-YFP transgenic and YFP plants mediated by PEBV. 30 leaves were collected to examine the growth of the pathogen at 0, 72, and 96 hpi. YFP means pCAPE2-YFP vector transformed tobaccos. Se/At-YFP represents pCAPE2-At/SeNHX1-YFP vector transformed tobaccos. Data are means  $\pm$  SE ( $n = 30$  leaves from 30 independent transgenic lines). The asterisks on the bars indicate significant differences from the YFP plants in the same treatment at  $P \leq 0.05$ .

**Supplementary Table S1.** The primers of ROS responsive genes used in real-time PCR.



## Supplementary Figure S2

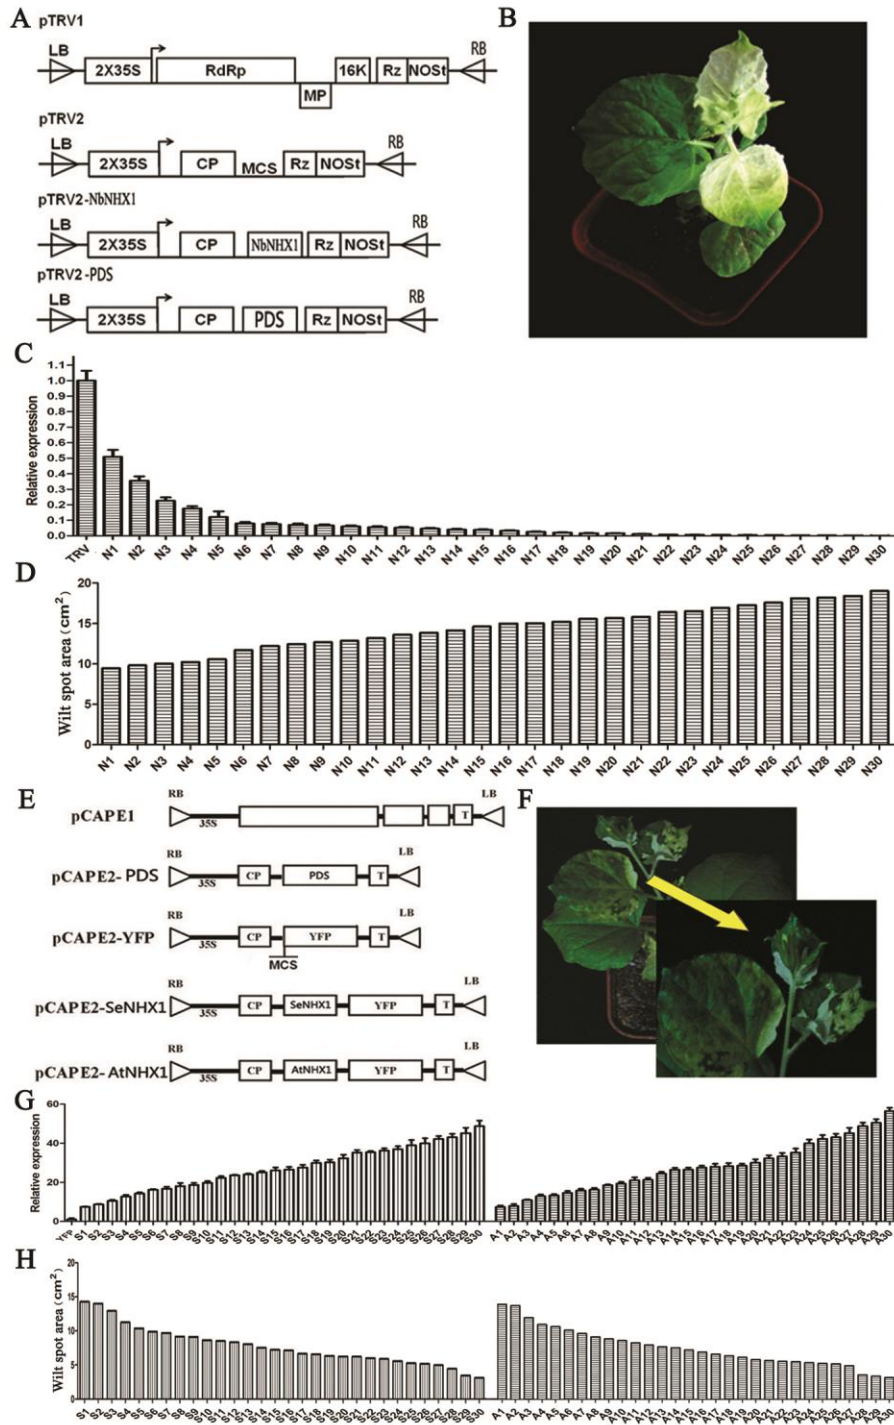

Supplementary Figure S3

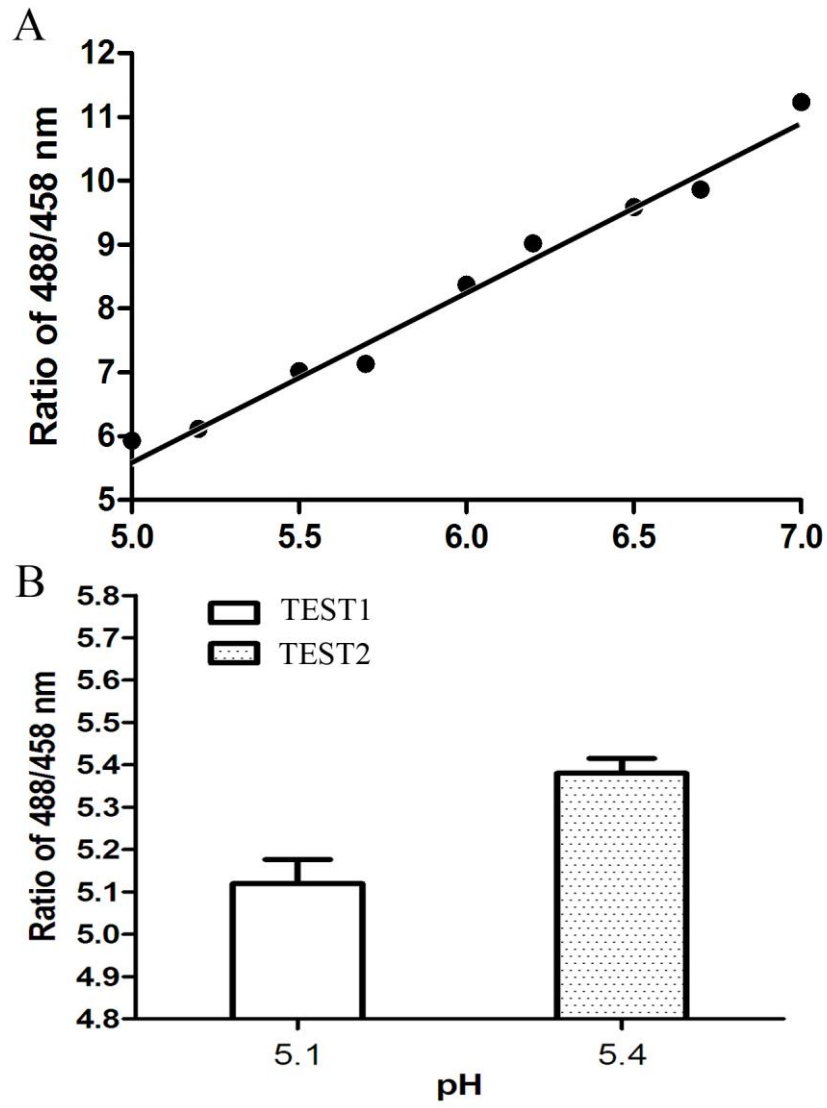

# Supplementary Figure S4

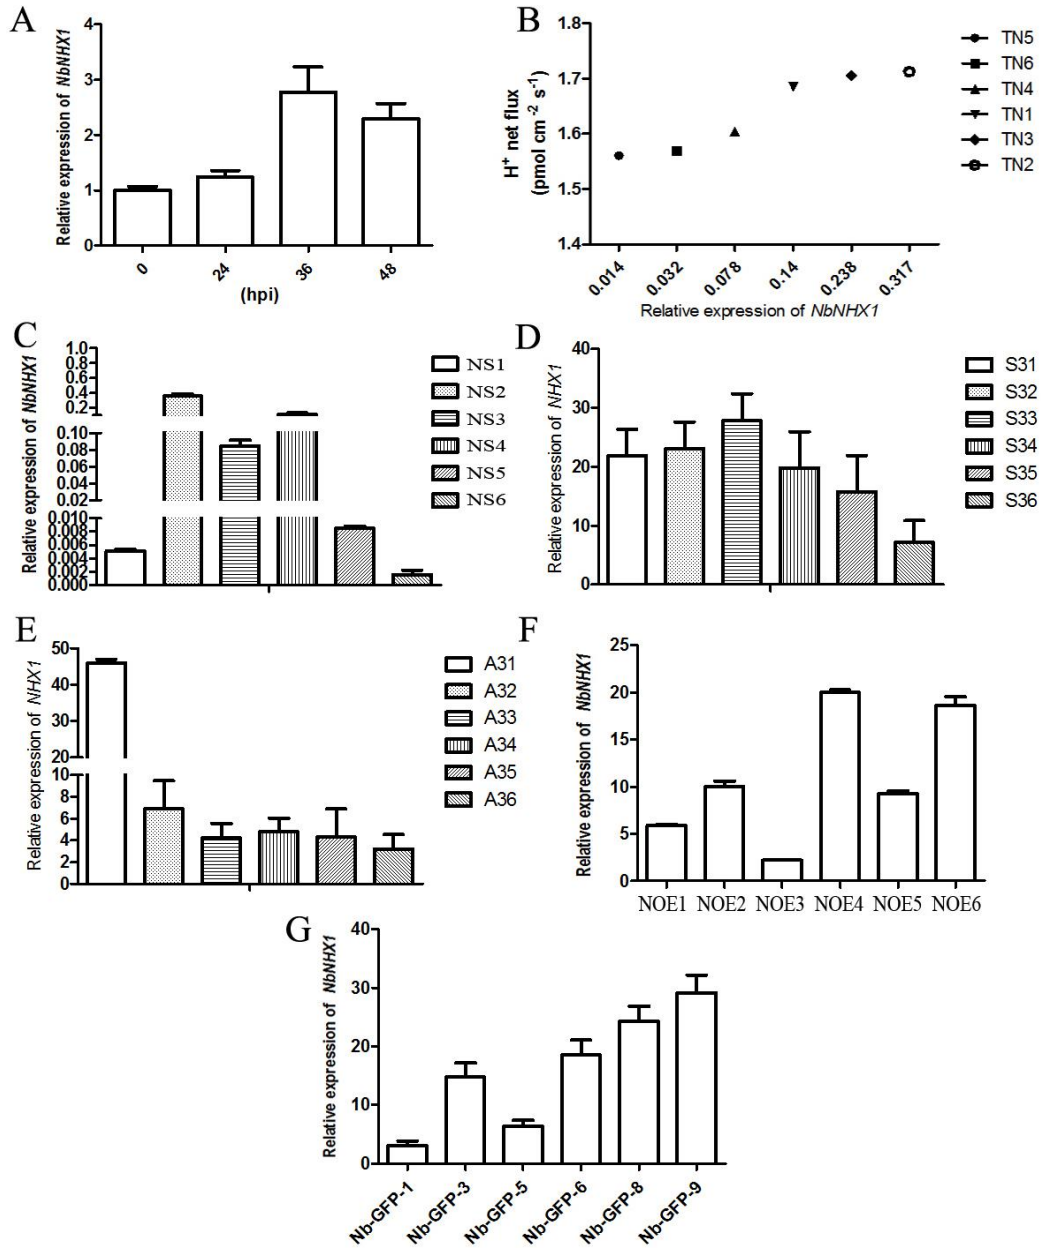

Supplementary Figure S5

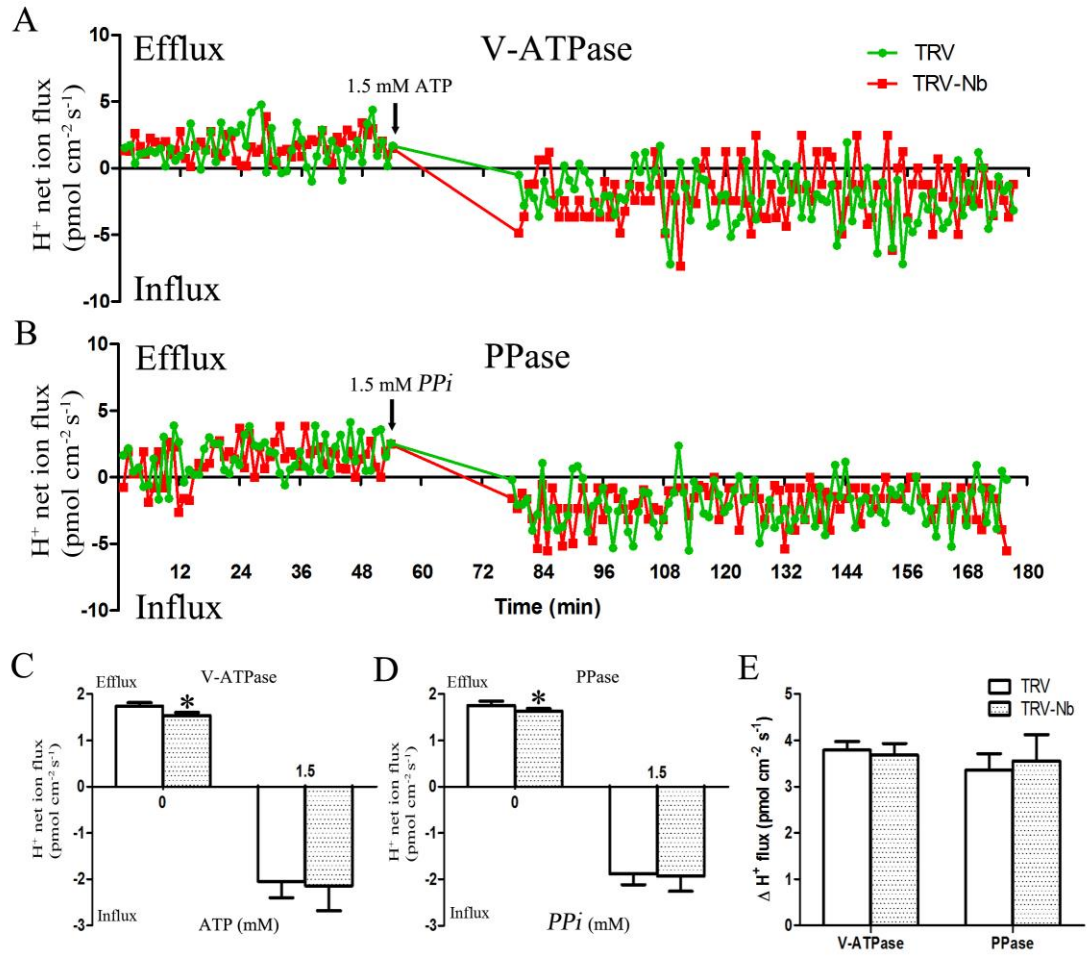



Supplementary Figure S6

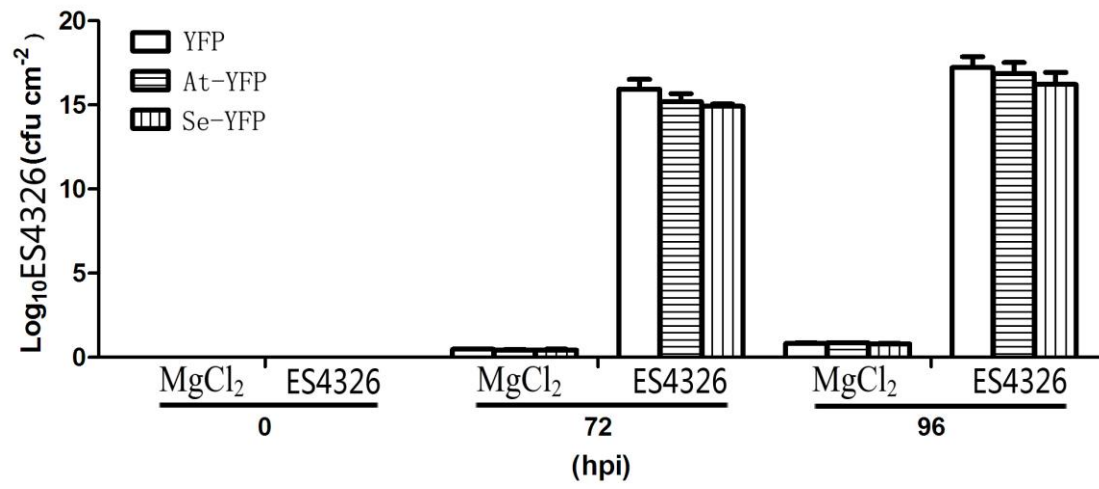

## Supplementary Table S1.

| Gene name | Unigene No. | Primers                                                                 |
|-----------|-------------|-------------------------------------------------------------------------|
| TPX1      | SGN-U505985 | F 5' GCCGTTGGTGACATCATTCCC 3'<br>R 5' CCTTTAGATTTCAACTCGTCAGC 3'        |
| COX6B     | SGN-U511126 | F 5' CAGGTTCCCAACAACCAATCAAA 3'<br>R 5' CCCATTCTCCCTCTGCTCGTT 3'        |
| CSD1      | SGN-U514519 | F 5' GCAGCAGTGAAGGTGTTAGTGGCA 3'<br>R 5' GGATTGTGGACCAGCAAGAGGAAT 3'    |
| CAT1      | SGN-U518840 | F 5' CATACAAGTACCGTCCGTCAAGTGC 3'<br>R 5' GAAAAACCCCTTGGCACTAGCACCTC 3' |
| TAPX      | SGN-U506407 | F 5' TCCCTCAAATGCCTCCAATCCT 3'<br>R 5' GCATTTGCGCGAGGCTAACG 3'          |
| PER21     | SGN-U506123 | F 5' TTGACAATGAAGCCCAGGTGA 3'<br>R 5' CTCCTCCGCAGATTGATTGG 3'           |
| PER12     | SGN-U515270 | F 5' CTGCTAGGGACTCTGTTGTCTTGACT 3'<br>R 5' CGACGGAGGACGACTGTGGTATT 3'   |
| NOS       | SGN-U518155 | F 5' TAAGACAACACGCCTTGGATT 3'<br>R 5' GCCTGCCTTACTATTTGCCTC 3'          |
| APX6      | SGN-U521022 | F 5' GGGTTTGGGAATCCAGTTGTC 3'<br>R 5' TGCAACAAGTTTGGTATAGGCATT 3'       |
| PRXR1     | SGN-U509102 | F 5' TTTGCGGAGGACAATTCTGGC 3'<br>R 5' CCTGGACTCCCTTTCAACAG 3'           |

|       |             |                                    |
|-------|-------------|------------------------------------|
| APX3  | SGN-U515717 | F 5' GGAAGGACGGTTGCCCGATGCT 3'     |
|       |             | R 5' TGTCTGTGGGAAGTTTCAGTAGGC 3'   |
| FSD2  | SGN-U508368 | F 5' CTGGTTCTGGCACAATAACGGCT 3'    |
|       |             | R 5' TCCTCCTCCGTTGGGCTTCA 3'       |
| FSD1  | SGN-U508369 | F 5' TGGCTCGCATACAAACCTGAA 3'      |
|       |             | R 5' CCACGACACGAGCTTCTCCATAA 3'    |
| MSD1  | SGN-U508400 | F 5' GTGAGCAGACGGACCTTAGCAACA 3'   |
|       |             | R 5' CGTGACCTCCGCCGTTGAATT 3'      |
| GST8  | SGN-U513459 | F 5' GCAGTATGTATGGGATGAGGGC 3'     |
|       |             | R 5' TTCACTGCATATTCATGTACGGTATT 3' |
| GST21 | SGN-U513460 | F 5' GGTTCCTGGGCTGATTACACTGAC 3'   |
|       |             | R 5' CCAAAGTAAGGTTTGTCTCCAAT 3'    |
| GST29 | SGN-U511196 | F 5' CAGCCAAGGGCAATGTCCAAGTA 3'    |
|       |             | R 5' GTTCTGGTCCATCTATTCTCCCTTCT 3' |
| PR1   | SGN-U512904 | F 5' TCAACTCAACGCCGCTGGTG 3'       |
|       |             | R 5' GAATCAAAGGGCTGTTGCTCTTCA 3'   |
| PR4   | SGN-U508784 | F 5' TTTCTGTGATGCTGCTGGACC 3'      |
|       |             | R 5' GCCTTGCTGATAGCCCACTCC 3'      |
| Gns1  | SGN-U515120 | F 5' GAAAGCCTGGACCTATTGAAACC 3'    |
|       |             | R 5' GCAGTAGCATTAGTTTCAACCGAAC 3'  |

---
